# Supplementary material
Source: publisher figshare collection journal article supplement (https://sage.figshare.com/ndownloader/files/13638341)
Supplement: Supplementary file 1 [file 13638341]

## APPENDIX A

### Compilation of Best Practices Regarding Ten Major Methodological Issues with OPD

| Recommendation                                                                                                                                                                                                        | Rationale for Recommendation                                                                                                                                                                                   | Cite(s) for Recommendation                                                                                                                                                                                                                                                                                                                                 | Empirical Support for Recommendation                                                                            | Empirical Support Against Recommendation                                                                                                                               | Disagreement or Issues with Recommendation                                                                                                                |
|-----------------------------------------------------------------------------------------------------------------------------------------------------------------------------------------------------------------------|----------------------------------------------------------------------------------------------------------------------------------------------------------------------------------------------------------------|------------------------------------------------------------------------------------------------------------------------------------------------------------------------------------------------------------------------------------------------------------------------------------------------------------------------------------------------------------|-----------------------------------------------------------------------------------------------------------------|------------------------------------------------------------------------------------------------------------------------------------------------------------------------|-----------------------------------------------------------------------------------------------------------------------------------------------------------|
| <b>Topic 1: Recruitment and Selection</b>                                                                                                                                                                             |                                                                                                                                                                                                                |                                                                                                                                                                                                                                                                                                                                                            |                                                                                                                 |                                                                                                                                                                        |                                                                                                                                                           |
| <ul style="list-style-type: none"> <li>• Post a “HIT” more than once and be sure to spread those HITs out across different times of the day or even days of the week</li> </ul>                                       | <ul style="list-style-type: none"> <li>• Acquire larger samples quicker</li> <li>• Ensure HITs are completed by participants with different habits</li> <li>• Pilot to make sure survey runs smooth</li> </ul> | <ul style="list-style-type: none"> <li>• Keith, Tay, &amp; Harms (2017)</li> <li>• Paolacci &amp; Chandler (2014)</li> </ul>                                                                                                                                                                                                                               | <ul style="list-style-type: none"> <li>• Chilton, Horton, Miller, &amp; Azenkot (2010)</li> </ul>               | <ul style="list-style-type: none"> <li>• N/A</li> </ul>                                                                                                                | <ul style="list-style-type: none"> <li>• Releasing multiple batches increases chance of cross-talk on forums</li> </ul>                                   |
| <ul style="list-style-type: none"> <li>• Only select workers who have completed relatively few (e.g., 0-100) studies</li> </ul>                                                                                       | <ul style="list-style-type: none"> <li>• Reduce risk of non-naïveté</li> </ul>                                                                                                                                 | <ul style="list-style-type: none"> <li>• Cheung et al. (2017)</li> <li>• Keith et al. (2017)</li> </ul>                                                                                                                                                                                                                                                    | <ul style="list-style-type: none"> <li>• N/A</li> </ul>                                                         | <ul style="list-style-type: none"> <li>• Peer et al (2014)</li> </ul>                                                                                                  | <ul style="list-style-type: none"> <li>• Workers who have completed large number of studies might be preferred (Cheung et al., 2017)</li> </ul>           |
| <ul style="list-style-type: none"> <li>• When reputation information is available, restrict samples to “high reputation” workers (e.g., &gt; 95% approval) and possibly higher number of completed studies</li> </ul> | <ul style="list-style-type: none"> <li>• “Low reputation” workers produce worse data</li> <li>• Beyond approval rate, the number of studies completed matters</li> </ul>                                       | <ul style="list-style-type: none"> <li>• Goodman &amp; Paolacci (2017)</li> <li>• Keith et al. (2017)</li> <li>• Peer et al. (2014)</li> </ul>                                                                                                                                                                                                             | <ul style="list-style-type: none"> <li>• Peer et al. (2014)</li> </ul>                                          | <ul style="list-style-type: none"> <li>• N/A</li> </ul>                                                                                                                | <ul style="list-style-type: none"> <li>• May increase presence of “professional survey takers,” limiting generalizability (Keith et al., 2017)</li> </ul> |
| <ul style="list-style-type: none"> <li>• Make use of built-in and user-designed qualification features</li> </ul>                                                                                                     | <ul style="list-style-type: none"> <li>• Reduce respondent deception</li> <li>• Approximate target sample representativeness</li> <li>• Prevent participation more than once</li> </ul>                        | <ul style="list-style-type: none"> <li>• Buhrmester et al. (2011)</li> <li>• Chandler et al. (2014)</li> <li>• Cheung et al. (2017)</li> <li>• Goodman &amp; Paolacci (2017)</li> <li>• Keith et al. (2017)</li> <li>• McGonagle (2015)</li> <li>• Paolacci &amp; Chandler (2014)</li> <li>• Stritch et al. (2017)</li> <li>• Woo et al. (2015)</li> </ul> | <ul style="list-style-type: none"> <li>• Chandler et al. (2014)</li> </ul>                                      | <ul style="list-style-type: none"> <li>• Sprouse (2011)</li> </ul>                                                                                                     | <ul style="list-style-type: none"> <li>• Use of qualifications may slow down recruitment</li> </ul>                                                       |
| <ul style="list-style-type: none"> <li>• Avoid qualification requirements not crucial to your research question</li> </ul>                                                                                            | <ul style="list-style-type: none"> <li>• Reduce potential range restriction</li> </ul>                                                                                                                         | <ul style="list-style-type: none"> <li>• Cheung et al. (2017)</li> </ul>                                                                                                                                                                                                                                                                                   | <ul style="list-style-type: none"> <li>• N/A</li> </ul>                                                         | <ul style="list-style-type: none"> <li>• N/A</li> </ul>                                                                                                                | <ul style="list-style-type: none"> <li>• N/A</li> </ul>                                                                                                   |
| <ul style="list-style-type: none"> <li>• Include eligibility requirements clearly in your recruitment advertisement</li> </ul>                                                                                        | <ul style="list-style-type: none"> <li>• Allow participants to self-select based on desired criteria</li> <li>• Avoid lost time, money, &amp; irritation</li> </ul>                                            | <ul style="list-style-type: none"> <li>• Lovett et al. (2018)</li> <li>• Stritch et al. (2017)</li> </ul>                                                                                                                                                                                                                                                  | <ul style="list-style-type: none"> <li>• N/A</li> </ul>                                                         | <ul style="list-style-type: none"> <li>• Chandler &amp; Shapiro (2016)</li> <li>• Peer et al. (2014)</li> <li>• Sharpe Wessling, Huber, &amp; Netzer (2017)</li> </ul> | <ul style="list-style-type: none"> <li>• Participants may lie about characteristics</li> </ul>                                                            |
| <ul style="list-style-type: none"> <li>• Design presurveys that do not give away participation requirements</li> </ul>                                                                                                | <ul style="list-style-type: none"> <li>• Reduce demand characteristics</li> </ul>                                                                                                                              | <ul style="list-style-type: none"> <li>• Chandler et al. (2014)</li> <li>• Chandler &amp; Shapiro (2016)</li> </ul>                                                                                                                                                                                                                                        | <ul style="list-style-type: none"> <li>• Chandler &amp; Shapiro (2016)</li> <li>• Peer et al. (2014)</li> </ul> | <ul style="list-style-type: none"> <li>• N/A</li> </ul>                                                                                                                | <ul style="list-style-type: none"> <li>• N/A</li> </ul>                                                                                                   |

|                                                                                                      |                                                                                                                                                                                                                                                                                                                                                                             |                                                                                                                                                                                                                                                                                                                           |                                                                                                      |       |                                                                                                                                        |
|------------------------------------------------------------------------------------------------------|-----------------------------------------------------------------------------------------------------------------------------------------------------------------------------------------------------------------------------------------------------------------------------------------------------------------------------------------------------------------------------|---------------------------------------------------------------------------------------------------------------------------------------------------------------------------------------------------------------------------------------------------------------------------------------------------------------------------|------------------------------------------------------------------------------------------------------|-------|----------------------------------------------------------------------------------------------------------------------------------------|
|                                                                                                      | <ul style="list-style-type: none"> <li>• Prevent researchers from identifying subgroups of interests after results are known</li> <li>• Avoid participants who misrepresent themselves</li> </ul>                                                                                                                                                                           | <ul style="list-style-type: none"> <li>• Cheung et al. (2017)</li> <li>• Goodman &amp; Paolacci (2017)</li> <li>• Goritz (2007)</li> <li>• Keith et al. (2017)</li> <li>• McGonagle (2015)</li> <li>• Shapiro, Chandler, &amp; Mueller (2013)</li> <li>• Smith et al. (2015)</li> <li>• Wessling et al. (2017)</li> </ul> |                                                                                                      |       |                                                                                                                                        |
| • Describe research tasks generically at the outset                                                  | • Minimize risk of self-selection                                                                                                                                                                                                                                                                                                                                           | <ul style="list-style-type: none"> <li>• Goodman &amp; Paolacci (2017)</li> <li>• McGonagle (2015)</li> </ul>                                                                                                                                                                                                             | • N/A                                                                                                | • N/A | • Could result in attrition if unaware of tasks                                                                                        |
| • Initially provide some details of the experiment and approximately what participants will be doing | • Minimize attrition                                                                                                                                                                                                                                                                                                                                                        | <ul style="list-style-type: none"> <li>• Horton, Rand, &amp; Zeckhauser (2011)</li> </ul>                                                                                                                                                                                                                                 | • N/A                                                                                                | • N/A | • Too much information revealed could lead to self-selection bias                                                                      |
| <b>Topic 2: Study Planning and Design</b>                                                            |                                                                                                                                                                                                                                                                                                                                                                             |                                                                                                                                                                                                                                                                                                                           |                                                                                                      |       |                                                                                                                                        |
| • Be aware of the existence of multiple OPPs and make use of those OPPs                              | <ul style="list-style-type: none"> <li>• Test theories across different samples</li> <li>• Find more naïve participants</li> <li>• Better response rates</li> <li>• Better data quality</li> <li>• More diverse participants</li> <li>• Avoid one dominant OPP shaping research questions and directions</li> <li>• Recruit qualitatively different participants</li> </ul> | <ul style="list-style-type: none"> <li>• Crone &amp; Williams (2017)</li> <li>• Gleibs (2017)</li> <li>• Goodman &amp; Paolacci (2017)</li> <li>• Miller et al. (2017)</li> <li>• Peterson &amp; Merunka (2014)</li> </ul>                                                                                                | • Peer et al. (2017)                                                                                 | • N/A | • N/A                                                                                                                                  |
| • Create unique completion codes that participants must submit to get paid                           | <ul style="list-style-type: none"> <li>• Link anonymous participants to responses</li> <li>• Reject poor data</li> </ul>                                                                                                                                                                                                                                                    | <ul style="list-style-type: none"> <li>• Buhrmester et al. (2011)</li> <li>• Keith et al. (2017)</li> <li>• Paolacci et al. (2010)</li> </ul>                                                                                                                                                                             | • N/A                                                                                                | • N/A | • Unless using third-party platform, can be time consuming and impractical to verify secret codes (Litman, Robinson, & Abberbock 2017) |
| • Be aware of and make use of third-party apps (e.g., TurkPrime) to help manage the research process | • Better manage the data collection process                                                                                                                                                                                                                                                                                                                                 | <ul style="list-style-type: none"> <li>• Gleibs (2017)</li> <li>• Horton et al. (2011)</li> <li>• Keith et al. (2017)</li> <li>• Mason &amp; Suri (2012)</li> <li>• Stritch et al. (2017)</li> </ul>                                                                                                                      | • Litman et al. (2017)                                                                               | • N/A | • N/A                                                                                                                                  |
| • Increase your sample size to offset anticipated decreases in power                                 | <ul style="list-style-type: none"> <li>• Deal with attenuated effects sizes due to non-naïveté</li> <li>• Low quality data can harm results</li> </ul>                                                                                                                                                                                                                      | <ul style="list-style-type: none"> <li>• Chandler et al. (2015)</li> <li>• Rouse (2015)</li> <li>• Sprouse (2011)</li> </ul>                                                                                                                                                                                              | <ul style="list-style-type: none"> <li>• Chandler et al. (2015)</li> <li>• Sprouse (2011)</li> </ul> | • N/A | • N/A                                                                                                                                  |
| • Avoid common experimental paradigms and psychological measures                                     | • Avoid problems with participant non-naïveté (e.g., practice effects)                                                                                                                                                                                                                                                                                                      | <ul style="list-style-type: none"> <li>• Chandler et al. (2014)</li> <li>• Goodman &amp; Paolacci (2017)</li> <li>• Hauser &amp; Schwarz (2016)</li> </ul>                                                                                                                                                                | • Chandler et al. (2014)                                                                             | • N/A | • N/A                                                                                                                                  |

|                                                                                                                                                              |                                                                                                                                                                       |                                                                                                                                                                                                                      |                                                                                                           |                                                                                                           |                                                                                                                                                                |
|--------------------------------------------------------------------------------------------------------------------------------------------------------------|-----------------------------------------------------------------------------------------------------------------------------------------------------------------------|----------------------------------------------------------------------------------------------------------------------------------------------------------------------------------------------------------------------|-----------------------------------------------------------------------------------------------------------|-----------------------------------------------------------------------------------------------------------|----------------------------------------------------------------------------------------------------------------------------------------------------------------|
|                                                                                                                                                              |                                                                                                                                                                       | <ul style="list-style-type: none"> <li>• Keith et al. (2017)</li> <li>• Paolacci &amp; Chandler (2014)</li> <li>• Paolacci et al. (2010)</li> <li>• Woo et al. (2015)</li> </ul>                                     |                                                                                                           |                                                                                                           |                                                                                                                                                                |
| • Ensure study design consistency when combining samples                                                                                                     | • Reduce chance that effect size differences are due to different design features                                                                                     | <ul style="list-style-type: none"> <li>• Cheung et al. (2017)</li> <li>• Mason &amp; Suri (2012)</li> </ul>                                                                                                          | • N/A                                                                                                     | • N/A                                                                                                     | • N/A                                                                                                                                                          |
| • Temporally separate IVs and DVs when possible and/or appropriate                                                                                           | <ul style="list-style-type: none"> <li>• Reduce common method variance</li> <li>• Reduce demand characteristics</li> <li>• Conduct test-retest reliability</li> </ul> | <ul style="list-style-type: none"> <li>• Paolacci &amp; Chandler (2014)</li> <li>• Stritch et al. (2017)</li> </ul>                                                                                                  | • N/A                                                                                                     | • N/A                                                                                                     | • Requires tracking IDs which could potentially be used to access personally identifiable information                                                          |
| • Use source-separation for surveys when possible and/or appropriate                                                                                         | • Reduce common method variance                                                                                                                                       | • Paolacci & Chandler (2014)                                                                                                                                                                                         | • N/A                                                                                                     | • N/A                                                                                                     | • Could violate terms of some OPPs to ask for personal info (Miller et al., 2017)                                                                              |
| • Avoid OPD for cross-cultural research in non-English speaking countries or when unnecessary                                                                | <ul style="list-style-type: none"> <li>• Avoid non-representative sample</li> <li>• Improve data quality</li> </ul>                                                   | <ul style="list-style-type: none"> <li>• Buhrmester et al. (2011)</li> <li>• Chandler &amp; Shapiro (2016)</li> <li>• Cheung et al. (2017)</li> <li>• Keith et al. (2017)</li> </ul>                                 | <ul style="list-style-type: none"> <li>• Feitosa et al. (2015)</li> <li>• Litman et al. (2015)</li> </ul> | • N/A                                                                                                     | • Studies have successfully used OPPs based in other countries to obtain acceptable quality data (e.g., Ng & Feldman 2012; Ng & Feldman, 2015)                 |
| • Make use of OPD for cross cultural research                                                                                                                | • Growing number of countries from which to draw a sample                                                                                                             | <ul style="list-style-type: none"> <li>• Goodman &amp; Paolacci (2017)</li> <li>• Paolacci et al. (2010)</li> <li>• Woo et al. (2015)</li> </ul>                                                                     | • N/A                                                                                                     | <ul style="list-style-type: none"> <li>• Feitosa et al. (2015)</li> <li>• Litman et al. (2015)</li> </ul> | <ul style="list-style-type: none"> <li>• Increase risk of sample bias in countries where English is not first language</li> <li>• Poor data quality</li> </ul> |
| <b>Topic 3: Measures and Controls</b>                                                                                                                        |                                                                                                                                                                       |                                                                                                                                                                                                                      |                                                                                                           |                                                                                                           |                                                                                                                                                                |
| • Ask participants if they have participated in similar experimental manipulations before                                                                    | • Account for non-naïveté                                                                                                                                             | <ul style="list-style-type: none"> <li>• Paolacci et al. (2010)</li> <li>• Woo et al. (2015)</li> </ul>                                                                                                              | • N/A                                                                                                     | • N/A                                                                                                     | • Participants may not remember (or may falsify) reports of prior participation                                                                                |
| • Track participant IDs to account for non-naïveté; asking participants if they have participated in similar experimental manipulations before is not enough | • Participants may not remember or may be dishonest when reporting on whether they have engaged in similar experiments                                                | <ul style="list-style-type: none"> <li>• Chandler et al. (2014)</li> <li>• Chandler et al. (2015)</li> <li>• Cheung et al. (2017)</li> <li>• Goodman &amp; Paolacci (2017)</li> <li>• Keith et al. (2017)</li> </ul> | • Chandler et al. (2015)                                                                                  | • N/A                                                                                                     | • Some evidence that worker IDs can be linked to personally identifying information                                                                            |
| • Measure the completion rate and bounce rate when possible                                                                                                  | • Account for potential impact of self-selection                                                                                                                      | • Keith et al. (2017)                                                                                                                                                                                                | • N/A                                                                                                     | • N/A                                                                                                     | • N/A                                                                                                                                                          |
| • Ask workers how they found your study                                                                                                                      | • Detect potential selection bias                                                                                                                                     | • Chandler et al. (2014)                                                                                                                                                                                             | • N/A                                                                                                     | • N/A                                                                                                     | • N/A                                                                                                                                                          |
| • Ask participants why they participated in your study                                                                                                       | • Understand if and how motivations affect substantive findings                                                                                                       | <ul style="list-style-type: none"> <li>• Cheung et al. (2017)</li> <li>• McGonagle (2015)</li> </ul>                                                                                                                 | • Fleischer, Mead, & Huang (2015)                                                                         | • N/A                                                                                                     | • N/A                                                                                                                                                          |
| • Measure perceived equity for participation                                                                                                                 | • Determine possible inequity                                                                                                                                         | • Gleibs (2017)                                                                                                                                                                                                      | • N/A                                                                                                     | • N/A                                                                                                     | • N/A                                                                                                                                                          |

|                                                                                                          |                                                                                                                                                                                |                                                                                               |                                                                                                               |                                                             |                                                                                                                                                                            |
|----------------------------------------------------------------------------------------------------------|--------------------------------------------------------------------------------------------------------------------------------------------------------------------------------|-----------------------------------------------------------------------------------------------|---------------------------------------------------------------------------------------------------------------|-------------------------------------------------------------|----------------------------------------------------------------------------------------------------------------------------------------------------------------------------|
| • Measure sources of “noise” in the participant’s physical environment                                   | • Identify and control for systematic differences in environments                                                                                                              | • Cheung et al. (2017)<br>• Lovett et al. (2018)                                              | • Chandler et al. (2014)<br>• Clifford & Jerit (2014)<br>• Lovett et al. (2018)                               | • N/A                                                       | • N/A                                                                                                                                                                      |
| • Control for the number studies previously completed by the participant                                 | • Evaluate non-naïveté<br>• Use as covariate in data analysis                                                                                                                  | • Goodman & Paolacci (2017)                                                                   | • N/A                                                                                                         | • N/A                                                       | • N/A                                                                                                                                                                      |
| <b>Topic 4: Informing</b>                                                                                |                                                                                                                                                                                |                                                                                               |                                                                                                               |                                                             |                                                                                                                                                                            |
| • Post informed consent                                                                                  | • Decrease social desirability                                                                                                                                                 | • Behrend et al. (2011)<br>• Mason & Suri (2012)                                              | • Behrend et al. (2011)                                                                                       | • N/A                                                       | • N/A                                                                                                                                                                      |
| • Provide debriefing when appropriate                                                                    | • Allow participants to understand purpose<br>• Provide way to contact researcher                                                                                              | • Mason & Suri (2012)<br>• Stritch et al. (2017)                                              | • N/A                                                                                                         | • N/A                                                       | • Debriefing may cause “loyal following” or increase non-naïveté (Chandler et al., 2014)                                                                                   |
| • Specify any physical environment requirements ahead of time                                            | • Reduce chance that extraneous factors influence findings                                                                                                                     | • Cheung et al. (2017)                                                                        | • N/A                                                                                                         | • N/A                                                       | • N/A                                                                                                                                                                      |
| • Ensure you provide good directions and that your survey formatting is free of error                    | • Improve data quality and effort put forth by participants                                                                                                                    | • Alonso & Mizzaro (2012)<br>• Lovett et al. (2018)                                           | • N/A                                                                                                         | • N/A                                                       | • N/A                                                                                                                                                                      |
| <b>Topic 5: Data Quality</b>                                                                             |                                                                                                                                                                                |                                                                                               |                                                                                                               |                                                             |                                                                                                                                                                            |
| • Provide warnings that inattentiveness will not result in compensation                                  | • Reduce risk of inattentiveness<br>• Foster withdrawal-without-prejudice<br>• Decrease attrition                                                                              | • Cheung et al. (2017)<br>• Gleibs (2017)<br>• Keith et al. (2017)<br>• Stritch et al. (2017) | • Huang, Liu, & Bowling (2015b)<br>• Huang, Curran, Keeney, Poposki, & DeShon (2012)                          | • N/A                                                       | • Could trigger reactance from participants                                                                                                                                |
| • Pay inattentive workers but consider blocking them from future participation                           | • Balance norms of OP community (i.e., reject bad work) with IRB requirements to avoid penalizing subjects who withdraw<br>• Maintain a positive reputation among participants | • Harms & DeSimone (2015)<br>• Keith et al. (2017)<br>• Paolacci et al. (2010)                | • N/A                                                                                                         | • N/A                                                       | • Moral obligation to avoid paying for bad work (Fleischer et al., 2015).<br>• Might violate IRB’s “without penalty” portion of right to withdraw (Fleischer et al., 2015) |
| • Offer a second chance to participants who fail attention checks                                        | • Provides justification for refusing HIT<br>• Minimizes perceptions of unfairness<br>• Protects Requestor’s reputation in OP community                                        | • Cheung et al. (2017)                                                                        | • Oppenheimer, Mevvis, & Davidenko (2009)                                                                     | • N/A                                                       | • There could be group differences between participants who initially failed checks and those that did not (Oppenheimer et al., 2009)                                      |
| • Award bonuses for high-quality work and let participants know ahead of time that bonuses are available | • Encourages high quality responses                                                                                                                                            | • Keith et al. (2017)<br>• Woo et al. (2015)                                                  | • Barger, Behrend, Sharek, & Sinar, 2011)<br>• Brawley & Pury (2016)<br>• Chandler, Paolacci & Mueller (2014) | • N/A                                                       | • Avoid incentivizing practices that you do not want to become norms (Hauser & Schwarz, 2016)                                                                              |
| • Set upper and lower rates on survey completion times and reject work exceeding those limits            | • Ensures responses that are too quick or too slow are automatically rejected                                                                                                  | • Mason & Suri (2012)<br>• Miller et al. (2017)<br>• Stritch et al. (2017)                    | • Huang et al. (2015b)<br>• Huang et al. (2012)<br>• Meade & Craig (2012)                                     | • Greszki, Meyer, & Schoen (2014)<br>• Lovett et al. (2018) | • Time limits may be a bad indicator of quality                                                                                                                            |

|                                                                                                                                                                       |                                                                                                                                                                                                                                                         |                                                                                                                                                                                                                                                                                                                                                                                                                                                                       |                                                                                                                                                                                                                                                      |                                                                                                                                                                                    |                                                                                                                                                                                                                                                                                         |
|-----------------------------------------------------------------------------------------------------------------------------------------------------------------------|---------------------------------------------------------------------------------------------------------------------------------------------------------------------------------------------------------------------------------------------------------|-----------------------------------------------------------------------------------------------------------------------------------------------------------------------------------------------------------------------------------------------------------------------------------------------------------------------------------------------------------------------------------------------------------------------------------------------------------------------|------------------------------------------------------------------------------------------------------------------------------------------------------------------------------------------------------------------------------------------------------|------------------------------------------------------------------------------------------------------------------------------------------------------------------------------------|-----------------------------------------------------------------------------------------------------------------------------------------------------------------------------------------------------------------------------------------------------------------------------------------|
| <ul style="list-style-type: none"> <li>Do not put a time limit on how fast or slow a survey can be completed by participants</li> </ul>                               | <ul style="list-style-type: none"> <li>Fast people can do accurate work as well as slow people</li> </ul>                                                                                                                                               | <ul style="list-style-type: none"> <li>Lovett et al. (2018)</li> <li>Matthijssse, De Leeuw, &amp; Hox (2015)</li> </ul>                                                                                                                                                                                                                                                                                                                                               | <ul style="list-style-type: none"> <li>Brawley &amp; Pury (2016)</li> <li>Greszki et al. (2014)</li> <li>Lovett et al. (2018)</li> </ul>                                                                                                             | <ul style="list-style-type: none"> <li>Aust et al. (2013)</li> <li>Huang et al. (2015a)</li> <li>Huang et al. (2012)</li> <li>Meade &amp; Craig (2012)</li> </ul>                  | <ul style="list-style-type: none"> <li>Participants who are unreasonably slow or fast may go undetected</li> </ul>                                                                                                                                                                      |
| <ul style="list-style-type: none"> <li>Create unique attention checks and/or use instructional manipulation checks</li> </ul>                                         | <ul style="list-style-type: none"> <li>Unique attention checks are less likely to be spotted by inattentive participants</li> </ul>                                                                                                                     | <ul style="list-style-type: none"> <li>Fleischer et al. (2015)</li> <li>Goodman &amp; Paolacci (2017)</li> <li>Rouse (2015)</li> </ul>                                                                                                                                                                                                                                                                                                                                | <ul style="list-style-type: none"> <li>Hauser &amp; Schwarz (2016)</li> </ul>                                                                                                                                                                        | <ul style="list-style-type: none"> <li>Peer et al. (2014)</li> </ul>                                                                                                               | <ul style="list-style-type: none"> <li>When samples are composed of high reputation workers, novel checks may be ineffective</li> </ul>                                                                                                                                                 |
| <ul style="list-style-type: none"> <li>Use conventional attention checks to identify and potentially remove responses provided by careless respondents</li> </ul>     | <ul style="list-style-type: none"> <li>Identify workers who miss obvious questions</li> <li>Reduce systematic bias which could inflate relationships</li> <li>Reduce the chance that measurement error will shrink correlations</li> </ul>              | <ul style="list-style-type: none"> <li>Cheung et al. (2017)</li> <li>Fleischer et al. (2015)</li> <li>Keith et al. (2017)</li> <li>Landers &amp; Behrend (2015)</li> <li>Mason &amp; Suri (2012)</li> <li>McGonagle (2015)</li> <li>Paolacci et al. (2010)</li> <li>Ran, Liu, Marchiondo, &amp; Huang (2015)</li> <li>Shapiro et al. (2013)</li> <li>Smith et al. (2015)</li> <li>Sprouse (2011)</li> <li>Stritch et al. (2017)</li> <li>Woo et al. (2015)</li> </ul> | <ul style="list-style-type: none"> <li>Fleischer et al. (2015)</li> <li>McGonagle (2015)</li> <li>Meade &amp; Craig (2012)</li> <li>Huang et al. (2015a)</li> <li>Huang et al. (2012)</li> <li>Huang et al. (2015b)</li> <li>Woods (2006)</li> </ul> | <ul style="list-style-type: none"> <li>Aust et al. (2013)</li> <li>Downs et al. (2012)</li> <li>Goodman et al. (2012)</li> <li>Peer et al. (2014)</li> <li>Rouse (2015)</li> </ul> | <ul style="list-style-type: none"> <li>Checks may be ineffective</li> <li>Could cause reactance on the part of participants</li> </ul>                                                                                                                                                  |
| <ul style="list-style-type: none"> <li>Ask participants whether they were attentive and give them option to have data removed</li> </ul>                              | <ul style="list-style-type: none"> <li>These types of checks have been shown to be effective where traditional attention checks have not</li> </ul>                                                                                                     | <ul style="list-style-type: none"> <li>Rouse (2015)</li> </ul>                                                                                                                                                                                                                                                                                                                                                                                                        | <ul style="list-style-type: none"> <li>Aust et al. (2013)</li> <li>Meade &amp; Craig (2012)</li> <li>Rouse (2015)</li> </ul>                                                                                                                         | <ul style="list-style-type: none"> <li>Oppenheimer et al. (2009)</li> </ul>                                                                                                        | <ul style="list-style-type: none"> <li>Could signal non-serious responses are expected, increasing bad data (Aust et al., 2013)</li> </ul>                                                                                                                                              |
| <ul style="list-style-type: none"> <li>Either prescreen for attentiveness or simply avoid using ex-post screening methods to identify careless respondents</li> </ul> | <ul style="list-style-type: none"> <li>Reduce concerns about researchers abusing screening to obtain results</li> <li>Ensures participants understand task</li> <li>Attention checks may not improve data quality</li> </ul>                            | <ul style="list-style-type: none"> <li>Chandler et al. (2014)</li> <li>Keith et al. (2017)</li> <li>Mason &amp; Suri (2012)</li> <li>Paolacci &amp; Chandler (2014)</li> <li>Paolacci et al. (2010)</li> <li>Ran et al. (2015)</li> </ul>                                                                                                                                                                                                                             | <ul style="list-style-type: none"> <li>Simmons, Nelson, &amp; Simonsohn (2011)</li> </ul>                                                                                                                                                            | <ul style="list-style-type: none"> <li>N/A</li> </ul>                                                                                                                              | <ul style="list-style-type: none"> <li>Reduced ability to compare participants on differences in main study variables</li> </ul>                                                                                                                                                        |
| <b>Topic 6: Comparisons</b>                                                                                                                                           |                                                                                                                                                                                                                                                         |                                                                                                                                                                                                                                                                                                                                                                                                                                                                       |                                                                                                                                                                                                                                                      |                                                                                                                                                                                    |                                                                                                                                                                                                                                                                                         |
| <ul style="list-style-type: none"> <li>Track participant IDs when available</li> </ul>                                                                                | <ul style="list-style-type: none"> <li>Prescreen participants who have already participated in same or similar study</li> <li>Collect longitudinal data</li> <li>Check for nonindependence</li> <li>Build a panel of participants for future</li> </ul> | <ul style="list-style-type: none"> <li>Chandler et al. (2015)</li> <li>Chandler &amp; Shapiro (2016)</li> <li>Cheung et al. (2017)</li> <li>Goodman &amp; Paolacci (2017)</li> <li>Mason &amp; Suri (2012)</li> <li>Paolacci et al. (2010)</li> <li>Stritch et al. (2017)</li> </ul>                                                                                                                                                                                  | <ul style="list-style-type: none"> <li>Chandler et al. (2015)</li> </ul>                                                                                                                                                                             | <ul style="list-style-type: none"> <li>Lease et al. (2013)</li> </ul>                                                                                                              | <ul style="list-style-type: none"> <li>Building a panel of participants could lead to panel conditioning (Chandler &amp; Shapir, 2016; Goritz, 2007)</li> <li>Could potentially reveal personally identifying information (Goodman &amp; Paolacci, 2017; Lease et al., 2013)</li> </ul> |

|                                                                                                                                                                                                                                                                                    |                                                                                                                                                                                                                                                                                                                          |                                                                                                                                                                                                                                                                                 |                                                                                                                                                                                                                  |                                                                                                                                                       |                                                                                                                                                                                              |
|------------------------------------------------------------------------------------------------------------------------------------------------------------------------------------------------------------------------------------------------------------------------------------|--------------------------------------------------------------------------------------------------------------------------------------------------------------------------------------------------------------------------------------------------------------------------------------------------------------------------|---------------------------------------------------------------------------------------------------------------------------------------------------------------------------------------------------------------------------------------------------------------------------------|------------------------------------------------------------------------------------------------------------------------------------------------------------------------------------------------------------------|-------------------------------------------------------------------------------------------------------------------------------------------------------|----------------------------------------------------------------------------------------------------------------------------------------------------------------------------------------------|
| <ul style="list-style-type: none"> <li>• Compare reliability estimates of your OPD sample to relevant comparison samples</li> </ul>                                                                                                                                                | <ul style="list-style-type: none"> <li>• Determine if there is statistical difference in scores to boost confidence in sample representativeness</li> </ul>                                                                                                                                                              | <ul style="list-style-type: none"> <li>• Rouse (2015)</li> </ul>                                                                                                                                                                                                                | <ul style="list-style-type: none"> <li>• Rouse (2015)</li> </ul>                                                                                                                                                 | <ul style="list-style-type: none"> <li>• N/A</li> </ul>                                                                                               | <ul style="list-style-type: none"> <li>• N/A</li> </ul>                                                                                                                                      |
| <ul style="list-style-type: none"> <li>• Capture IP addresses and reject responses from the same IP address</li> </ul>                                                                                                                                                             | <ul style="list-style-type: none"> <li>• Screen for multiple responses from same individual</li> </ul>                                                                                                                                                                                                                   | <ul style="list-style-type: none"> <li>• Cheung et al (2017)</li> <li>• Mason &amp; Suri (2012)</li> <li>• Smith et al. (2015)</li> <li>• Stritch et al. (2017)</li> </ul>                                                                                                      | <ul style="list-style-type: none"> <li>• Horton et al. (2011)</li> <li>• Jilke, Van Ryzin, &amp; Van de Walle (2016)</li> </ul>                                                                                  | <ul style="list-style-type: none"> <li>• Aust et al. (2013)</li> <li>• Berinsky, Huber, &amp; Lenz (2012)</li> <li>• Shapiro et al. (2013)</li> </ul> | <ul style="list-style-type: none"> <li>• It is possible to have more than one worker from the same IP address (Gosling, Vazire, Srivastava, &amp; John, 2004; Smith et al., 2015)</li> </ul> |
| <b>Topic 7: Managing Relationships</b>                                                                                                                                                                                                                                             |                                                                                                                                                                                                                                                                                                                          |                                                                                                                                                                                                                                                                                 |                                                                                                                                                                                                                  |                                                                                                                                                       |                                                                                                                                                                                              |
| <ul style="list-style-type: none"> <li>• Thank workers and embed tasks with “meaning”—explain meaning of tasks they will complete</li> </ul>                                                                                                                                       | <ul style="list-style-type: none"> <li>• Increase data quality</li> <li>• Pay alone isn’t enough—participants want “fun” studies</li> </ul>                                                                                                                                                                              | <ul style="list-style-type: none"> <li>• Fleischer et al. (2015)</li> <li>• Matthijssee et al. (2015)</li> <li>• Paolacci &amp; Chandler (2014)</li> </ul>                                                                                                                      | <ul style="list-style-type: none"> <li>• Brawley &amp; Pury (2016)</li> <li>• Chandler &amp; Kapelner (2013)</li> <li>• Chandler et al. (2014)</li> <li>• Lovett et al. (2018)</li> </ul>                        | <ul style="list-style-type: none"> <li>• N/A</li> </ul>                                                                                               | <ul style="list-style-type: none"> <li>• Questionable value of intrinsically motivating research</li> </ul>                                                                                  |
| <ul style="list-style-type: none"> <li>• Monitor discussion boards for chatter about your study</li> </ul>                                                                                                                                                                         | <ul style="list-style-type: none"> <li>• Identify instances where the purpose of your study might be revealed (i.e., deception or manipulation)</li> <li>• Boost confidence in stable unit treatment value assumption</li> </ul>                                                                                         | <ul style="list-style-type: none"> <li>• Chandler et al. (2014)</li> <li>• Cheung et al. (2017)</li> <li>• Goodman &amp; Paolacci (2017)</li> <li>• Horton et al. (2011)</li> <li>• Keith et al. (2017)</li> </ul>                                                              | <ul style="list-style-type: none"> <li>• Horton et al. (2011)</li> <li>• Rogstadius, Kostakos, Kittur, Smus, Laredo, &amp; Vukovic (2011)</li> <li>• Schmidt (2015)</li> <li>• Wessling et al. (2017)</li> </ul> | <ul style="list-style-type: none"> <li>• N/A</li> </ul>                                                                                               | <ul style="list-style-type: none"> <li>• The low base rate of problematic chatter could render this recommendation an inefficient use of time</li> </ul>                                     |
| <ul style="list-style-type: none"> <li>• Avoid experiments involving deception and consider guaranteeing you will not use deception in your studies</li> </ul>                                                                                                                     | <ul style="list-style-type: none"> <li>• Foster trust between researchers and participants in general</li> <li>• There is a greater chance that participants have seen similar deception</li> </ul>                                                                                                                      | <ul style="list-style-type: none"> <li>• Horton et al. (2011)</li> <li>• Mason &amp; Suri (2012)</li> <li>• Schmidt (2015)</li> </ul>                                                                                                                                           | <ul style="list-style-type: none"> <li>• N/A</li> </ul>                                                                                                                                                          | <ul style="list-style-type: none"> <li>• N/A</li> </ul>                                                                                               | <ul style="list-style-type: none"> <li>• Deception may not be problematic if participants are debriefed</li> </ul>                                                                           |
| <ul style="list-style-type: none"> <li>• Review formal OPP-specific guidelines and act ethically by, for example, clearly identifying yourself to participants, providing reasonable time estimates, paying as soon as possible, and maintaining lines of communication</li> </ul> | <ul style="list-style-type: none"> <li>• Foster good relations between researchers and participants</li> <li>• Ensure workers are able to make informed decisions about completing task</li> <li>• Avoid potential attrition</li> <li>• Avoid reputation damage to researcher</li> <li>• Enhance data quality</li> </ul> | <ul style="list-style-type: none"> <li>• Gleibs (2017)</li> <li>• Goodman &amp; Paolacci (2017)</li> <li>• Keith et al. (2017)</li> <li>• Lovett et al. (2018)</li> <li>• Mason &amp; Suri (2012)</li> <li>• Paolacci et al. (2010)</li> <li>• Stritch et al. (2017)</li> </ul> | <ul style="list-style-type: none"> <li>• Brawley &amp; Pury (2016)</li> <li>• Lovett et al. (2018)</li> </ul>                                                                                                    | <ul style="list-style-type: none"> <li>• N/A</li> </ul>                                                                                               | <ul style="list-style-type: none"> <li>• N/A</li> </ul>                                                                                                                                      |
| <ul style="list-style-type: none"> <li>• Read forums to get a sense of OP participants and introduce yourself to the OP community via web forums if possible</li> </ul>                                                                                                            | <ul style="list-style-type: none"> <li>• Provide researchers with a more realistic picture of the participants</li> <li>• Open the door to communication</li> </ul>                                                                                                                                                      | <ul style="list-style-type: none"> <li>• Goodman &amp; Paolacci (2017)</li> <li>• Lovett et al. (2018)</li> <li>• Mason &amp; Suri (2012)</li> <li>• Schmidt (2015)</li> <li>• Wessling et al. (2017)</li> </ul>                                                                | <ul style="list-style-type: none"> <li>• Lovett et al. (2018)</li> </ul>                                                                                                                                         | <ul style="list-style-type: none"> <li>• N/A</li> </ul>                                                                                               | <ul style="list-style-type: none"> <li>• N/A</li> </ul>                                                                                                                                      |
| <ul style="list-style-type: none"> <li>• Provide justifiable and concrete reasons to a participant if rejecting that participant’s work</li> </ul>                                                                                                                                 | <ul style="list-style-type: none"> <li>• Prevent misunderstandings</li> </ul>                                                                                                                                                                                                                                            | <ul style="list-style-type: none"> <li>• Cheung et al. (2017)</li> <li>• Gleibs (2017)</li> <li>• Harms &amp; DeSimone (2015)</li> <li>• Paolacci et al. (2010)</li> </ul>                                                                                                      | <ul style="list-style-type: none"> <li>• Brawley &amp; Pury (2016)</li> </ul>                                                                                                                                    | <ul style="list-style-type: none"> <li>• N/A</li> </ul>                                                                                               | <ul style="list-style-type: none"> <li>• N/A</li> </ul>                                                                                                                                      |

| Topic 8: Compensation                                                                                                                                                          |                                                                                                                                                                                                                                                                                                    |                                                                                                                                                                                                                                            |                                                                                                                                                    |                                                                                                                                     |                                                                                                                                                                                                                              |
|--------------------------------------------------------------------------------------------------------------------------------------------------------------------------------|----------------------------------------------------------------------------------------------------------------------------------------------------------------------------------------------------------------------------------------------------------------------------------------------------|--------------------------------------------------------------------------------------------------------------------------------------------------------------------------------------------------------------------------------------------|----------------------------------------------------------------------------------------------------------------------------------------------------|-------------------------------------------------------------------------------------------------------------------------------------|------------------------------------------------------------------------------------------------------------------------------------------------------------------------------------------------------------------------------|
| • Pay a “fair” wage                                                                                                                                                            | <ul style="list-style-type: none"> <li>• Ethical principle of justice</li> <li>• Goodwill</li> <li>• Faster recruiting</li> <li>• Participants are increasingly reliant on OPD for a sustainable source of income</li> </ul>                                                                       | <ul style="list-style-type: none"> <li>• Behrend et al. (2011)</li> <li>• Crone &amp; Williams (2017)</li> <li>• Gleibs (2017)</li> <li>• Goodman &amp; Paolacci (2017)</li> <li>• Lovett et al. (2018)</li> <li>• Rouse (2015)</li> </ul> | • Crump et al. (2013)                                                                                                                              | • N/A                                                                                                                               | <ul style="list-style-type: none"> <li>• Field must decide on what constitutes “fair” pay</li> <li>• Does “fair pay” result in best results?</li> </ul>                                                                      |
| • Pay an appealing—but not overly appealing—wage                                                                                                                               | <ul style="list-style-type: none"> <li>• Reduce likelihood of participants lying about characteristics</li> <li>• Recruit faster</li> </ul>                                                                                                                                                        | <ul style="list-style-type: none"> <li>• Goodman &amp; Paolacci (2017)</li> <li>• Smith et al. (2015)</li> </ul>                                                                                                                           | <ul style="list-style-type: none"> <li>• Brawley &amp; Pury (2016)</li> <li>• Crump et al. (2013)</li> <li>• Rogstadius et al. (2011)</li> </ul>   | • N/A                                                                                                                               | • Trouble defining “overly appealing” wages                                                                                                                                                                                  |
| • Pay a low wage—or at least avoid enticing monetary incentives                                                                                                                | <ul style="list-style-type: none"> <li>• OPPs are a “bottom shelf” market</li> <li>• Participants usually don’t rely on wages.</li> <li>• Participants are not forced to work</li> <li>• Low wages don’t impact results</li> <li>• Reduce chances that workers lie about qualifications</li> </ul> | <ul style="list-style-type: none"> <li>• Crone &amp; Williams (2017)</li> <li>• Mason &amp; Suri (2012)</li> <li>• Paolacci et al. (2010)</li> <li>• Smith et al. (2015)</li> </ul>                                                        | <ul style="list-style-type: none"> <li>• Buhrmester et al. (2011)</li> <li>• Chandler et al. (2014)</li> <li>• Mason &amp; Watts (2009)</li> </ul> | <ul style="list-style-type: none"> <li>• Aker, El-Haj, Albakour, &amp; Kruschwitz (2012)</li> <li>• Lovett et al. (2018)</li> </ul> | <ul style="list-style-type: none"> <li>• Ethical implications—just because low wages do not impact results does not make it ethical to pay low wages</li> <li>• Some evidence indicates low pay does hurt results</li> </ul> |
| • Pay at least median reservation wage                                                                                                                                         | • Presumed fairness                                                                                                                                                                                                                                                                                | <ul style="list-style-type: none"> <li>• Behrend et al. (2011)</li> <li>• Paolacci et al. (2010)</li> </ul>                                                                                                                                | • Horton & Chilton (2010)                                                                                                                          | • N/A                                                                                                                               | • This is a target that changes with time and perhaps across OPPs                                                                                                                                                            |
| • Pay U.S. Federal minimum wage                                                                                                                                                | • Lower pay than physical lab because less involved, but fair                                                                                                                                                                                                                                      | • Goodman & Paolacci (2017)                                                                                                                                                                                                                | • N/A                                                                                                                                              | • N/A                                                                                                                               | • Relatively high pay may encourage dishonesty                                                                                                                                                                               |
| • Pay participants whatever going market rate is (e.g., \$2/hour)                                                                                                              | • Pay rates do not affect the quality of data                                                                                                                                                                                                                                                      | • Stritch et al. (2017)                                                                                                                                                                                                                    | • N/A                                                                                                                                              | • N/A                                                                                                                               | • The “market rate” may not be considered “fair”                                                                                                                                                                             |
| • Increase compensation when follow-up timeframes increase or more effort is required on the part of the participant                                                           | • Improve retention rate                                                                                                                                                                                                                                                                           | <ul style="list-style-type: none"> <li>• Behrend et al. (2011)</li> <li>• Goodman &amp; Paolacci (2017)</li> <li>• Keith et al. (2017)</li> </ul>                                                                                          | • N/A                                                                                                                                              | • N/A                                                                                                                               | • N/A                                                                                                                                                                                                                        |
| • Use a “hook” strategy where difficult upfront tasks that pay more must be completed before easy tasks are offered (total payment forfeited if entire study is not completed) | • Improve retention rate                                                                                                                                                                                                                                                                           | <ul style="list-style-type: none"> <li>• Goodman &amp; Paolacci (2017)</li> <li>• Horton et al. (2011)</li> </ul>                                                                                                                          | • N/A                                                                                                                                              | • N/A                                                                                                                               | • Participants may feel mislead or trapped in a study when sunk costs are involved                                                                                                                                           |
| Topic 9: Reporting                                                                                                                                                             |                                                                                                                                                                                                                                                                                                    |                                                                                                                                                                                                                                            |                                                                                                                                                    |                                                                                                                                     |                                                                                                                                                                                                                              |
| • Be transparent with regard to materials used in your study and the methods used to recruit participants                                                                      | • Avoid potential for arbitrary design choices to influence sample composition                                                                                                                                                                                                                     | <ul style="list-style-type: none"> <li>• Gleibs (2017)</li> <li>• Paolacci &amp; Chandler (2014)</li> </ul>                                                                                                                                | • N/A                                                                                                                                              | • N/A                                                                                                                               | • N/A                                                                                                                                                                                                                        |
| • Report the amount of compensation participants received and the average study completion time                                                                                | <ul style="list-style-type: none"> <li>• Transparency</li> <li>• Future meta-analyses of payment on sample characteristics</li> </ul>                                                                                                                                                              | <ul style="list-style-type: none"> <li>• Keith et al. (2017)</li> <li>• Paolacci et al. (2010)</li> </ul>                                                                                                                                  | • Keith et al. (2017)                                                                                                                              | • N/A                                                                                                                               | • N/A                                                                                                                                                                                                                        |

|                                                                                                                                                                                                   |                                                                                                                                                                      |                                                                                                                                                                                              |                                                                                                                                                                        |                                                         |                                                                                                                                                                                        |
|---------------------------------------------------------------------------------------------------------------------------------------------------------------------------------------------------|----------------------------------------------------------------------------------------------------------------------------------------------------------------------|----------------------------------------------------------------------------------------------------------------------------------------------------------------------------------------------|------------------------------------------------------------------------------------------------------------------------------------------------------------------------|---------------------------------------------------------|----------------------------------------------------------------------------------------------------------------------------------------------------------------------------------------|
| <ul style="list-style-type: none"> <li>• If using attention checks or similar indicators to screen for quality, report results both before and after screening techniques were applied</li> </ul> | <ul style="list-style-type: none"> <li>• Increased transparency and understand impact of data screening on research</li> </ul>                                       | <ul style="list-style-type: none"> <li>• Cheung et al. (2017)</li> <li>• Goodman &amp; Paolacci (2017)</li> <li>• Keith et al. (2017)</li> <li>• Shapiro et al. (2013)</li> </ul>            | <ul style="list-style-type: none"> <li>• Chandler et al. (2014)</li> <li>• Cheung et al. (2017)</li> <li>• Keith et al. (2017)</li> <li>• Ran et al. (2015)</li> </ul> | <ul style="list-style-type: none"> <li>• N/A</li> </ul> | <ul style="list-style-type: none"> <li>• N/A</li> </ul>                                                                                                                                |
| <ul style="list-style-type: none"> <li>• Collect and report the following: demographics; compensation; the participant's country of residence; and how non-naïveté was handled</li> </ul>         | <ul style="list-style-type: none"> <li>• Avoid relying on prior research for sample representativeness of OPP as a whole</li> <li>• Increase transparency</li> </ul> | <ul style="list-style-type: none"> <li>• Chandler et al. (2014)</li> <li>• Goodman &amp; Paolacci (2017)</li> <li>• Keith et al. (2017)</li> <li>• Paolacci &amp; Chandler (2014)</li> </ul> | <ul style="list-style-type: none"> <li>• Keith et al. (2017)</li> </ul>                                                                                                | <ul style="list-style-type: none"> <li>• N/A</li> </ul> | <ul style="list-style-type: none"> <li>• N/A</li> </ul>                                                                                                                                |
| <b>Topic 10: Institutional Responsibilities</b>                                                                                                                                                   |                                                                                                                                                                      |                                                                                                                                                                                              |                                                                                                                                                                        |                                                         |                                                                                                                                                                                        |
| <ul style="list-style-type: none"> <li>• Journals should offer clear instructions to authors on reporting of survey response rates and how to address nonresponse</li> </ul>                      | <ul style="list-style-type: none"> <li>• Continue examining evidence of sampling error</li> </ul>                                                                    | <ul style="list-style-type: none"> <li>• Fisher &amp; Sandell (2015)</li> </ul>                                                                                                              | <ul style="list-style-type: none"> <li>• N/A</li> </ul>                                                                                                                | <ul style="list-style-type: none"> <li>• N/A</li> </ul> | <ul style="list-style-type: none"> <li>• N/A</li> </ul>                                                                                                                                |
| <ul style="list-style-type: none"> <li>• Reviewers and editors should create standards for “low quality” data screening and reporting</li> </ul>                                                  | <ul style="list-style-type: none"> <li>• Researchers can adopt a screening method—a priori—based on recommendations</li> </ul>                                       | <ul style="list-style-type: none"> <li>• Ran et al. (2015)</li> </ul>                                                                                                                        | <ul style="list-style-type: none"> <li>• N/A</li> </ul>                                                                                                                | <ul style="list-style-type: none"> <li>• N/A</li> </ul> | <ul style="list-style-type: none"> <li>• There might not be a “one size fits all” standard for screening</li> <li>• Screening may be unnecessary</li> </ul>                            |
| <ul style="list-style-type: none"> <li>• Journals should require authors to report pay and the average length of the study</li> </ul>                                                             | <ul style="list-style-type: none"> <li>• Better understanding of pay per hour</li> </ul>                                                                             | <ul style="list-style-type: none"> <li>• Gleibs (2017)</li> </ul>                                                                                                                            | <ul style="list-style-type: none"> <li>• N/A</li> </ul>                                                                                                                | <ul style="list-style-type: none"> <li>• N/A</li> </ul> | <ul style="list-style-type: none"> <li>• Unclear if minimum wage is problematic</li> </ul>                                                                                             |
| <ul style="list-style-type: none"> <li>• Universities/departments should provide funding to pay participants at least minimum wage</li> </ul>                                                     | <ul style="list-style-type: none"> <li>• Avoid exploiting workers</li> </ul>                                                                                         | <ul style="list-style-type: none"> <li>• Gleibs (2017)</li> </ul>                                                                                                                            | <ul style="list-style-type: none"> <li>• N/A</li> </ul>                                                                                                                | <ul style="list-style-type: none"> <li>• N/A</li> </ul> | <ul style="list-style-type: none"> <li>• Unclear if minimum wage is “too attractive” and could be problematic</li> </ul>                                                               |
| <ul style="list-style-type: none"> <li>• Internal Review Boards should consider fair pay</li> </ul>                                                                                               | <ul style="list-style-type: none"> <li>• Protect participants and adhere to ethical standards</li> </ul>                                                             | <ul style="list-style-type: none"> <li>• Gleibs (2017)</li> </ul>                                                                                                                            | <ul style="list-style-type: none"> <li>• N/A</li> </ul>                                                                                                                | <ul style="list-style-type: none"> <li>• N/A</li> </ul> | <ul style="list-style-type: none"> <li>• Many IRB members feel that any monetary payment is undue influence (Klitzman, 2013; Largent, Grady, Miller, &amp; Wertheimer 2012)</li> </ul> |
